# Supplementary material for: Detection of tuberculosis in cynomolgus macaques (Macaca fascicularis) using a supplementary Monkey Interferon Gamma Releasing Assay (mIGRA)
Source: PubMed Central journal article supplement (PMC7541520; doi:10.1038/s41598-020-73655-3), 2020-10-07
Supplement: 41598_2020_73655_MOESM1_ESM.pdf [file 41598_2020_73655_MOESM1_ESM.pdf]

**Detection of Tuberculosis in cynomolgus macaques (*Macaca fascicularis*) using a supplementary Monkey Interferon Gamma Releasing Assay (mIGRA)**

S. Warit<sup>1\*</sup>, P. Billamas<sup>1</sup>, N. Makhao<sup>1</sup>, S. Jaitrong<sup>1</sup>, T. Juthayothin<sup>1</sup>, W. Yindeeyoungyeon<sup>1</sup>, K. Dokladda<sup>1</sup>, N. Smittipat<sup>1</sup>, T. Kemthong<sup>2</sup>, S. Meesawat<sup>2,3</sup>, N. Kongsombat<sup>2</sup>, C. Kraitat<sup>2</sup>, T. Prammananan<sup>1</sup>, T. Palaga<sup>4</sup>, A. Chaiprasert<sup>5</sup> & S. Malaivijitnond<sup>2,3\*</sup>

<sup>1</sup> Industrial Tuberculosis Team, Industrial Medical Molecular Biotechnology Research Group, National Center for Genetic Engineering and Biotechnology, National Science and Technology Development Agency, 113 Thailand Science Park, Phahonyothin Road, Khlong Nueng, Khlong Luang, Pathum Thani, 12120, Thailand.

<sup>2</sup> National Primate Research Center of Thailand-Chulalongkorn University, Saraburi, 18110, Thailand.

<sup>3</sup> Department of Biology, Faculty of Science, Chulalongkorn University, Bangkok, 10330, Thailand.

<sup>4</sup> Department of Microbiology, Faculty of Science, Chulalongkorn University, Bangkok, 10330, Thailand.

<sup>5</sup> Office for Research and Development, Faculty of Medicine Siriraj hospital, Mahidol University, Bangkok, 10700, Thailand.

\*Co-corresponding authors

Saradee Warit; e-mail: saradee@biotec.or.th

Suchinda Malaivijitnond; e-mail: suchinda.m@chula.ac.th

**Table S1 Raw data of IFN- $\gamma$  values (pg/ml) obtained from NIL, TB1, TB2, and Mitogen (MIT) tubes** Monkey plasma samples were diluted to 1:4 and used for determinations of the IFN- $\gamma$  concentrations with the monkey IFN- $\gamma$  ELISApr kit (Mabtech AB, Nacka Strand, Sweden). **Equation 2** was used for the calculation and interpretation of TB infection from the mIGRA results (see more details in Methods). There are no mIGRA data for month 2. Gray boxes indicate cynomolgus monkeys whose TB culture showed positive results. P, N, and ID represent positive, negative, or indeterminate mIGRA results, respectively. N/A means not applicable.

| sample name | month 0  |        |        |        |              | month 4 |         |         |         |              | month 6 |         |         |        |              | month 8 |        |        |         |              | month 10 |        |        |         |              | month 12 |         |         |          |              |   |  |  |  |  |  |  |  |  |  |  |
|-------------|----------|--------|--------|--------|--------------|---------|---------|---------|---------|--------------|---------|---------|---------|--------|--------------|---------|--------|--------|---------|--------------|----------|--------|--------|---------|--------------|----------|---------|---------|----------|--------------|---|--|--|--|--|--|--|--|--|--|--|
|             | NIL      | TB1    | TB2    | MIT    | mIGRA Result | NIL     | TB1     | TB2     | MIT     | mIGRA Result | NIL     | TB1     | TB2     | MIT    | mIGRA Result | NIL     | TB1    | TB2    | MIT     | mIGRA Result | NIL      | TB1    | TB2    | MIT     | mIGRA Result | NIL      | TB1     | TB2     | MIT      | mIGRA Result |   |  |  |  |  |  |  |  |  |  |  |
| MKx019      | 101.53   | 677.48 | 884.23 | 273.17 | P            | death   |         |         |         |              |         |         |         |        |              |         |        |        |         |              |          |        |        |         |              |          |         |         |          |              |   |  |  |  |  |  |  |  |  |  |  |
| MKx020      | 13       | 17.41  | 21.86  | 12.17  | ID           | 27.49   | 134.7   | 137.01  | 87.37   | P            | death   |         |         |        |              |         |        |        |         |              |          |        |        |         |              |          |         |         |          |              |   |  |  |  |  |  |  |  |  |  |  |
| MKx027      | 12.45    | 112.64 | 115.52 | 436.47 | P            | 53.5    | 1088.28 | 1012.32 | 224.38  | P            | 149.85  | 439.18  | 466.77  | 782.57 | P            | death   |        |        |         |              |          |        |        |         |              |          |         |         |          |              |   |  |  |  |  |  |  |  |  |  |  |
| MKx010      | 14.91    | 21.36  | 26.14  | 35.79  | P            | death   |         |         |         |              |         |         |         |        |              |         |        |        |         |              |          |        |        |         |              |          |         |         |          |              |   |  |  |  |  |  |  |  |  |  |  |
| MKx014      | 0        | 0      | 0      | 23.09  | N            | 0       | 0       | 4.69    | 579.33  | N            | 35.65   | 112.3   | 106.41  | 652.85 | P            | 23.6    | 91.9   | 97.02  | 139.41  | P            | 80.31    | 229.94 | 233.82 | 428.24  | P            | 206.208  | 252.768 | 249.268 | 373.74   | P            |   |  |  |  |  |  |  |  |  |  |  |
| MKx021      | 0        | 0      | 0      | 5.67   | ID           | death   |         |         |         |              |         |         |         |        |              |         |        |        |         |              |          |        |        |         |              |          |         |         |          |              |   |  |  |  |  |  |  |  |  |  |  |
| MKx026      | 47.79    | 41.55  | 62     | 98.9   | P            | death   |         |         |         |              |         |         |         |        |              |         |        |        |         |              |          |        |        |         |              |          |         |         |          |              |   |  |  |  |  |  |  |  |  |  |  |
| MKx035      | 98.97    | 293.48 | 363.86 | 113.24 | P            | 211.4   | 834.84  | 1020.65 | 446.53  | P            | 502.5   | 1070.32 | 1213.79 | 287.54 | ID           | death   |        |        |         |              |          |        |        |         |              |          |         |         |          |              |   |  |  |  |  |  |  |  |  |  |  |
| MKx018      | 0.24     | 2.36   | 3.73   | 21.36  | P            | 14.14   | 85.92   | 72.52   | 87.37   | P            | 188.81  | 521.74  | 499.38  | 149.45 | P            | death   |        |        |         |              |          |        |        |         |              |          |         |         |          |              |   |  |  |  |  |  |  |  |  |  |  |
| MKx005      | 0        | 0      | 0      | 0.41   | ID           | 0       | 56.16   | 60.87   | 133.49  | P            | 0       | 45.16   | 59.59   | 85.36  | P            | 6.89    | 52.27  | 56.82  | 77.9    | P            | death    |        |        |         |              |          |         |         |          |              |   |  |  |  |  |  |  |  |  |  |  |
| MKx012      | 0        | 0      | 0      | 636.13 | N            | 120.61  | 690     | 530.33  | 1908.07 | P            | 0       | 136.69  | 118.73  | 961.21 | P            | 26.69   | 170.33 | 182.96 | 1034.67 | P            | 0        | 71.5   | 50.73  | 139.96  | P            | 0        | 234.424 | 242.288 | 2835.116 | P            |   |  |  |  |  |  |  |  |  |  |  |
| MKx013      | 0        | 13     | 10.89  | 317.72 | P            | 0       | 100.92  | 134.43  | 131.05  | P            | 0       | 47.42   | 55.69   | 220.59 | P            | 51.57   | 881.82 | 799.14 | 698.03  | P            | death    |        |        |         |              |          |         |         |          |              |   |  |  |  |  |  |  |  |  |  |  |
| MKx042      | N/A      |        |        |        |              | 0       | 291.13  | 314.22  | 119.81  | P            | 64.11   | 626.64  | 504.93  | 247.84 | P            | 37.19   | 719.86 | 698.62 | 221.06  | P            | 90.35    | 664.74 | 620.06 | 384.2   | P            | 0        | 490.008 | 372.008 | 212.208  | P            |   |  |  |  |  |  |  |  |  |  |  |
| MKx051      | 0        | 0      | 0      | 0      | ID           | 0       | 0       | 0       | 645.51  | N            | 0       | 0       | 0       | 520.28 | N            | 0       | 0      | 0      | 1137.49 | N            | 0        | 46     | 60.46  | 2513.78 | P            | death    |         |         |          |              |   |  |  |  |  |  |  |  |  |  |  |
| MKx052      | no blood |        |        |        |              | 0       | 11.68   | 23.66   | 546.93  | P            | 0       | 12.16   | 11.94   | 476.68 | P            | 0       | 67.92  | 58.2   | 776.36  | P            | 0        | 145.58 | 168.16 | 6129.2  | P            | 0        | 0       | 0       | 504.548  | N            |   |  |  |  |  |  |  |  |  |  |  |
| MKx002      | 0        | 0      | 0      | 15.71  | N            | 0       | 0       | 0       | 12.59   | N            | 0       | 0       | 0       | 35.35  | N            | 0       | 2.72   | 3.5    | 67.24   | N            | 0        | 0      | 0      | 124.12  | N            | 0        | 0       | 0       | 145.452  | N            |   |  |  |  |  |  |  |  |  |  |  |
| MKx007      | 0        | 0      | 0      | 9.87   | ID           | 0       | 0       | 0       | 97.5    | N            | 0       | 0       | 0       | 140.38 | N            | 0       | 0      | 0      | 68.47   | N            | 0        | 0      | 0      | 0       | ID           | 0        | 0       | 0       | 259.98   | N            |   |  |  |  |  |  |  |  |  |  |  |
| MKx008      | N/A      |        |        |        |              | 0       | 0       | 0       | 127.02  | N            | 0       | 0       | 0       | 36.26  | N            | 40.48   | 39.2   | 30.75  | 166.68  | ID           | 7.98     | 0      | 0      | 0       | 298.26       | ID       | 0       | 0       | 0        | 304.72       | N |  |  |  |  |  |  |  |  |  |  |
| MKx009      | 0        | 0      | 0      | 92.95  | N            | 0       | 0       | 0       | 1234.41 | N            | 0       | 0       | 0       | 185.62 | N            | 20.75   | 2.72   | 5.15   | 455.69  | ID           | 0        | 0      | 0      | 0       | 698.45       | N        | 0       | 0       | 0        | 1571.244     | N |  |  |  |  |  |  |  |  |  |  |
| MKx011      | 0        | 0      | 0      | 48.06  | N            | 0       | 0       | 0       | 41.16   | N            | 0       | 0       | 0       | 222.01 | N            | 69.83   | 55.17  | 54.75  | 123.59  | ID           | 0        | 0      | 0      | 0       | 151.42       | N        | 0       | 0       | 0        | 283.6        | N |  |  |  |  |  |  |  |  |  |  |
| MKx017      | 0        | 0      | 0      | 13.41  | N            | 0       | 0       | 0       | 195.92  | N            | 0       | 0       | 0       | 154.31 | N            | 5.15    | 1.88   | 3.24   | 272.85  | ID           | 0        | 0      | 0      | 0       | 121.19       | N        | N/A     |         |          |              |   |  |  |  |  |  |  |  |  |  |  |
| MKx029      | 0        | 0      | 0      | 252.09 | N            | 5.34    | 5.34    | 11.91   | 347.82  | N            | 0       | 0       | 0       | 508.45 | N            | 0       | 0      | 0      | 553.48  | N            | 156.32   | 0      | 0      | 0       | 0            | ID       | death   |         |          |              |   |  |  |  |  |  |  |  |  |  |  |
| MKx030      | 0        | 0      | 0      | 140.05 | N            | 0       | 0       | 0       | 31.97   | N            | 0       | 0       | 0       | 18.97  | N            | 0.92    | 0      | 0      | 101.75  | ID           | 0        | 0      | 0      | 0       | 135.89       | N        | 0       | 0       | 0        | 177.848      | N |  |  |  |  |  |  |  |  |  |  |
| MKx031      | 0        | 0.71   | 3.16   | 28.3   | N            | 0       | 0       | 0       | 886.27  | N            | death   |         |         |        |              |         |        |        |         |              |          |        |        |         |              |          |         |         |          |              |   |  |  |  |  |  |  |  |  |  |  |
| MKx033      | 0        | 0      | 0      | 203.49 | N            | 11.45   | 14.78   | 12.82   | 896.5   | N            | 0       | 0       | 0       | 292.88 | N            | 0       | 0      | 0      | 206.13  | N            | 0        | 0      | 0      | 1820.14 | N            | 0        | 0       | 0       | 1394.34  | N            |   |  |  |  |  |  |  |  |  |  |  |
| MKx034      | 0        | 0      | 0      | 45.25  | N            | 0       | 0       | 0       | 213.8   | N            | 0       | 0       | 0       | 188.67 | N            | 0       | 0      | 0      | 123.15  | N            | 0        | 0      | 0      | 167.37  | N            | 0        | 0       | 0       | 0        | ID           |   |  |  |  |  |  |  |  |  |  |  |
| MKx036      | 0        | 0      | 0      | 97     | N            | 0       | 0       | 0       | 128.23  | N            | 0       | 0       | 0       | 92.25  | N            | 0       | 0      | 0      | 35.45   | N            | 0        | 0      | 0      | 52.83   | N            | 0        | 0       | 0       | 44.884   | N            |   |  |  |  |  |  |  |  |  |  |  |
| MKx037      | 0        | 0      | 0      | 137.38 | N            | 0       | 0       | 0       | 367.71  | N            | 0       | 0       | 0       | 244.98 | N            | 0       | 0      | 0      | 191.43  | N            | 0        | 0      | 0      | 406.82  | N            | 0        | 0       | 0       | 259.612  | N            |   |  |  |  |  |  |  |  |  |  |  |
| MKx038      | 0        | 0      | 0      | 10.6   | ID           | 0       | 0       | 0       | 154.25  | N            | 0       | 0       | 0       | 54.87  | N            | 0       | 0      | 0      | 0       | ID           | N/A      |        |        |         |              |          |         |         |          |              |   |  |  |  |  |  |  |  |  |  |  |
| MKx040      | N/A      |        |        |        |              | 0       | 0       | 0       | 37.04   | N            | 0       | 0       | 0       | 206.36 | N            | 0       | 0      | 0      | 471.9   | N            | 0        | 0      | 0      | 435.99  | N            | 0        | 0       | 0       | 0        | ID           |   |  |  |  |  |  |  |  |  |  |  |
| MKx043      | 0        | 0      | 0      | 582.95 | N            | 0       | 0       | 0       | 145.77  | N            | 0       | 0       | 0       | 125.45 | N            | N/A     |        |        |         |              | 0        | 0      | 0      | 779.97  | N            | 0        | 0       | 0       | 561.568  | N            |   |  |  |  |  |  |  |  |  |  |  |
| MKx044      | N/A      |        |        |        |              | 0       | 0       | 0       | 115.96  | N            | 0       | 0       | 0       | 741.76 | N            | 28.66   | 36.47  | 35.74  | 580.95  | N            | 0        | 0      | 0      | 0       | 0            | ID       | 0       | 0       | 0        | 366.748      | N |  |  |  |  |  |  |  |  |  |  |
| MKx046      | N/A      |        |        |        |              | 0       | 0       | 0       | 235.95  | N            | 0       | 0       | 0       | 185.33 | N            | 6.04    | 0.53   | 1.58   | 349.12  | ID           | 92.85    | 0      | 0      | 0       | 347.33       | ID       | 0       | 0       | 0        | 294.624      | N |  |  |  |  |  |  |  |  |  |  |
| MKx047      | 0        | 0      | 0      | 10.6   | ID           | 0       | 0       | 0       | 317.22  | N            | 0       | 0       | 0       | 713.74 | N            | 0       | 0      | 0      | 138.67  | N            | 0        | 0      | 0      | 2922.57 | N            | 0        | 0       | 0       | 82.356   | N            |   |  |  |  |  |  |  |  |  |  |  |
| MKx048      | 0        | 0      | 0      | 351.9  | N            | 0       | 0       | 0       | 471.9   | N            | 0       | 0       | 0       | 209.56 | N            | 23.6    | 14.94  | 14.24  | 402.08  | ID           | 0        | 0      | 0      | 1635.46 | N            | 0        | 0       | 0       | 619.156  | N            |   |  |  |  |  |  |  |  |  |  |  |
| MKx050      | N/A      |        |        |        |              | 0       | 0       | 0       | 558.28  | N            | 0       | 0       | 0       | 141.05 | N            | 0       | 0      | 0      | 1047.05 | N            | 0        | 0      | 0      | 2454.27 | N            | 0        | 0       | 0       | 1001.524 | N            |   |  |  |  |  |  |  |  |  |  |  |
| MKx054      | 0        | 0      | 0      | 495.57 | N            | 0       | 0       | 0       | 856.82  | N            | 0       | 0       | 0       | 901.15 | N            | 0       | 0      | 0      | 1154.81 | N            | 0        | 0      | 0      | 1946.4  | N            | 0        | 0       | 0       | 2173.944 | N            |   |  |  |  |  |  |  |  |  |  |  |
| MKx059      | 0        | 0      | 0      | 682.51 | N            | 0       | 0       | 0       | 260.63  | N            | 0       | 0       | 0       | 247.51 | N            | 3.24    | 0.53   | 2.17   | 549.63  | ID           | 0        | 0      | 0      | 1538.16 | N            | 0        | 0       | 0       | 1144.492 | N            |   |  |  |  |  |  |  |  |  |  |  |
| MKx060      | 0        | 0      | 0      | 10.31  | ID           | 0       | 0       | 0       | 139.33  | N            | 0       | 0       | 0       | 225.82 | N            | 0       | 0      | 0      | 39.91   | N            | 0        | 0      | 0      | 30.56   | N            | 0        | 0       | 0       | 165.016  | N            |   |  |  |  |  |  |  |  |  |  |  |



**Table S3 TB diagnosis results of the mIGRA, the TST, and TB culture** All results of the mIGRA, the TST and TB culture were obtained from 6-7 rounds of sample collections (2-month time interval). The mIGRA results were reported as positive (P), negative (N) and indeterminate (ID). For the TST, scores of N1+ and N2+ were for negative TB results, and scores of S3+, P4+ and P5+ were for positive TB results. A score of 3 by the TST indicated suspected TB (S3+) in this study. NTM means nontuberculous mycobacteria. Gray boxes indicate monkeys whose TB culture results were positive. N/A means not applicable.

| Group   | Monkey ID | mIGRA   |         |         |         |         |          | TST      |         |         |         |         |         | TB culture |              |              |              |              |              |              |              |              |  |
|---------|-----------|---------|---------|---------|---------|---------|----------|----------|---------|---------|---------|---------|---------|------------|--------------|--------------|--------------|--------------|--------------|--------------|--------------|--------------|--|
|         |           | month 0 | month 2 | month 4 | month 6 | month 8 | month 10 | month 12 | month 0 | month 2 | month 4 | month 6 | month 8 | month 10   | month 12     | month 0      | month 2      | month 4      | month 6      | month 8      | month 10     | month 12     |  |
| group 1 | MKx005    | ID      | N/A     | P       | P       | P       | death    | N        | N       | N/A     | N       | N       | death   | No growth  | NTM          | No growth    | NTM          | contaminated | contaminated | death        |              |              |  |
|         | MKx012    | N       | N/A     | P       | P       | P       | P        | N        | N       | N/A     | N       | N       | N       | NTM        | NTM          | contaminated | NTM          | contaminated | contaminated | contaminated | contaminated |              |  |
|         | MKx014    | N       | N/A     | N       | P       | P       | P        | N        | N       | N/A     | P 4+    | S 3+    | N 1+    | N 1+       | NTM          | NTM          | contaminated | M.tb         | contaminated | M.tb         | M.tb         |              |  |
|         | MKx020    | ID      | N/A     | P       |         | death   |          | P 4+     | S 3+    | N/A     |         |         | death   | M.tb       | contaminated |              |              |              |              | death        |              |              |  |
| group 2 | MKx051    | ID      | N/A     | N       | N       | N       | P        | death    | N       | N 2+    | N/A     | N       | N       | S 3+       | death        | contaminated | NTM          | NTM          | No growth    | NTM          | NTM          | death        |  |
|         | MKx035    | P       | N/A     | P       | ID      |         | death    |          | N       | N 1+    | N/A     | N 1+    |         | death      | NTM          | M.tb         | M.tb         | NTM          |              |              | death        |              |  |
|         | MKx052    | N/A     | N/A     | P       | P       | P       | P        | N        | N       | N       | N/A     | N       | N       | N          | NTM          | NTM          | NTM          | NTM          | No growth    | contaminated | contaminated |              |  |
|         | MKx010    | P       | N/A     | death   |         |         |          |          | N       | S 3+    | death   |         |         |            | contaminated | M.tb         | death        |              |              |              |              |              |  |
| group 3 | MKx013    | P       | N/A     | P       | P       | P       | death    |          | S 3+    | N       | N/A     | N/A     | N       | death      | NTM          | NTM          | NTM          | contaminated | NTM          | death        |              |              |  |
|         | MKx018    | P       | N/A     | P       | P       |         | death    |          | P 4+    | N 2+    | N/A     | S 3+    |         | death      | NTM          | contaminated | contaminated | NTM          |              | death        | death        |              |  |
|         | MKx019    | P       |         |         |         | death   |          |          | P 4+    |         |         | S 3+    |         | death      | M.tb         | contaminated |              |              |              | death        | death        |              |  |
|         | MKx026    | P       | N/A     |         |         | death   |          |          | N       | N       |         |         |         | death      | M.tb         | contaminated |              |              |              |              |              |              |  |
|         | MKx027    | P       | N/A     | P       | P       | death   |          |          | P 4+    | P 4+    | N/A     | S 3+    |         | death      | contaminate  | NTM          | contaminated | M.tb         |              | death        |              |              |  |
|         | MKx042    | N/A     | N/A     | P       | P       | P       | P        |          | N       | N       | N/A     | N       | N 2+    | N          | NTM          | No growth    | contaminated | No growth    | NTM          | contaminated | contaminated | contaminated |  |
|         | MKx007    | ID      | N/A     | N       | N       | N       | ID       | N        | N       | N       | N/A     | N       | N       | N          | NTM          | No growth    | No growth    | NTM          | contaminated | contaminated | contaminated | contaminated |  |
| group 4 | MKx008    | N/A     | N/A     | N       | N       | N       | ID       | N        | N       | N       | N/A     | N       | N       | N          | contaminated | NTM          | No growth    | contaminated | contaminated | NTM          | contaminated | contaminated |  |
|         | MKx009    | N       | N/A     | N       | N       | N       | ID       | N        | N       | N       | N/A     | N       | N       | N          | NTM          | contaminated | N/A          | contaminated | contaminated | contaminated | contaminated | contaminated |  |
|         | MKx011    | N       | N/A     | N       | N       | N       | ID       | N        | N       | N       | N/A     | N       | N       | N          | NTM          | contaminated | contaminated | contaminated | NTM          | contaminated | contaminated |              |  |
|         | MKx017    | N       | N/A     | N       | N       | N       | ID       | N        | N/A     | N       | N/A     | N 1+    | N       | N          | NTM          | NTM          | No growth    | contaminated | contaminated | NTM          | NTM          |              |  |
|         | MKx029    | N       | N/A     | N       | N       | N       | ID       | death    | N       | N       | N/A     | N       | N       | S 3+       | death        | NTM          | NTM          | NTM          | NTM          | NTM          | NTM          | death        |  |
|         | MKx030    | N       | N/A     | N       | N       | N       | ID       | N        | N       | N       | N/A     | N       | N       | N          | NTM          | NTM          | NTM          | contaminated | NTM          | contaminated | contaminated |              |  |
|         | MKx034    | N       | N/A     | N       | N       | N       | N        | ID       | N       | N       | N/A     | N       | N       | N          | NTM          | NTM          | NTM          | No growth    | NTM          | NTM          | NTM          |              |  |
|         | MKx038    | ID      | N/A     | N       | N       | N       | ID       | N/A      | N       | N       | N/A     | N       | N       | N/A        | N            | No growth    | NTM          | NTM          | NTM          | No growth    | N/A          | NTM          |  |
|         | MKx040    | N/A     | N/A     | N       | N       | N       | N        | ID       | N       | N       | N/A     | N       | N       | N          | N            | No growth    | NTM          | NTM          | NTM          | No growth    | contaminated | contaminated |  |
|         | MKx044    | N/A     | N/A     | N       | N       | N       | N        | ID       | N       | N       | N/A     | N       | N/A     | N          | N            | contaminated | No growth    | contaminated | NTM          | No growth    | contaminated | contaminated |  |
|         | MKx046    | N/A     | N/A     | N       | N       | N       | ID       | ID       | N       | N       | N/A     | N       | N       | N          | N            | NTM          | contaminated | NTM          | contaminated | No growth    | NTM          | NTM          |  |
|         | MKx047    | ID      | N/A     | N       | N       | N       | N        | N        | N       | N       | N/A     | N       | N       | N          | N            | NTM          | NTM          | contaminate  | NTM          | NTM          | NTM          | NTM          |  |
|         | MKx048    | N       | N/A     | N       | N       | N       | ID       | N        | N       | N       | N/A     | N       | N       | N          | N            | NTM          | contaminated | NTM          | contaminated | NTM          | contaminated | contaminated |  |
|         | MKx059    | N       | N/A     | N       | N       | N       | ID       | N        | N       | N       | N/A     | N       | N       | N          | N            | contaminated | NTM          | contaminate  | No growth    | NTM          | NTM          | NTM          |  |
| MKx060  | ID        | N/A     | N       | N       | N       | N       | N        | N        | N       | N/A     | N       | N       | N       | N          | contaminated | NTM          | NTM          | NTM          | NTM          | NTM          | NTM          |              |  |
| group 5 | MKx002    | N       | N/A     | N       | N       | N       | N        | N        | N       | N/A     | N       | N       | N       | N          | NTM          | No growth    | No growth    | NTM          | contaminated | contaminated | contaminated |              |  |
|         | MKx031    | N       | N/A     | N       |         | death   |          |          | N       | N+2     | N/A     |         | death   | NTM        | No growth    | No growth    |              |              |              | death        |              |              |  |
|         | MKx033    | N       | N/A     | N       | N       | N       | N        | N        | N       | N       | N/A     | N       | N       | N          | NTM          | NTM          | contaminated | No growth    | NTM          | No growth    | NTM          | contaminated |  |
|         | MKx036    | N       | N/A     | N       | N       | N       | N        | N        | N       | N       | N/A     | N       | N       | N          | contaminated | No growth    | NTM          | contaminated | contaminated | NTM          | NTM          | NTM          |  |
|         | MKx037    | N       | N/A     | N       | N       | N       | N        | N        | N       | N       | N/A     | N       | N       | N          | NTM          | NTM          | No growth    | NTM          | NTM          | NTM          | NTM          | NTM          |  |
|         | MKx043    | N       | N/A     | N       | N       | N       | N/A      | N        | N       | N       | N/A     | N       | N       | N          | N            | NTM          | NTM          | NTM          | NTM          | N/A          | contaminated | contaminated |  |
| ungroup | MKx050    | N/A     | N/A     | N       | N       | N       | N        | N        | N       | N       | N/A     | N       | N       | N          | NTM          | NTM          | NTM          | NTM          | NTM          | NTM          | contaminated | contaminated |  |
|         | MKx054    | N       | N/A     | N       | N       | N       | N        | N        | N       | N       | N/A     | N       | N       | N          | No growth    | NTM          | NTM          | NTM          | NTM          | NTM          | NTM          | NTM          |  |
|         | MKx021    | ID      | N/A     |         |         | death   |          |          | N       | N       |         |         | death   | M.tb       | contaminated |              |              |              |              | death        |              |              |  |

**Table S4 Summary of TB diagnosis results of 39 cynomolgus monkeys by the mIGRA, TST and TB culture methods** These summary results were evaluated from 6-7 rounds of all interpreted results. Gray boxes indicate monkeys whose TB culture results were positive. The mIGRA results were reported as positive (P), negative (N) or indeterminate (ID). For the TST method, the results were reported positive (P), suspected (S), or negative (N). Using the TB culture method, positive (P) and negative (N) results were reported. In this study, an indeterminate mIGRA result was considered negative (N) for TB infection, while a suspected TST (S) result was considered positive for TB infection.

| Monkey ID | mIGRA  | TST   | TB culture |
|-----------|--------|-------|------------|
| MKx019    | P      | P     | P          |
| MKx020    | P      | P     | P          |
| MKx027    | P      | P     | P          |
| MKx010    | P      | S (P) | P          |
| MKx014    | P      | P     | P          |
| MKx021    | ID (N) | N     | P          |
| MKx026    | P      | N     | P          |
| MKx035    | P      | N     | P          |
| MKx018    | P      | P     | N          |
| MKx005    | P      | N     | N          |
| MKx012    | P      | N     | N          |
| MKx013    | P      | S (P) | N          |
| MKx042    | P      | N     | N          |
| MKx051    | P      | S (P) | N          |
| MKx052    | P      | N     | N          |
| MKx002    | N      | N     | N          |
| MKx007    | N      | N     | N          |
| MKx008    | N      | N     | N          |
| MKx009    | N      | S (P) | N          |
| MKx011    | N      | N     | N          |
| MKx017    | N      | N     | N          |
| MKx029    | N      | S (P) | N          |
| MKx030    | N      | N     | N          |
| MKx031    | N      | N     | N          |
| MKx033    | N      | N     | N          |
| MKx034    | N      | N     | N          |
| MKx036    | N      | N     | N          |
| MKx037    | N      | N     | N          |
| MKx038    | N      | N     | N          |
| MKx040    | N      | N     | N          |
| MKx043    | N      | N     | N          |
| MKx044    | N      | N     | N          |
| MKx046    | N      | N     | N          |
| MKx047    | N      | N     | N          |
| MKx048    | N      | N     | N          |
| MKx050    | N      | N     | N          |
| MKx054    | N      | N     | N          |
| MKx059    | N      | N     | N          |
| MKx060    | N      | N     | N          |

**Table S5 Monkey body weight in kilograms (kg) versus time (months) for 14 positive-mIGRA monkeys** The percentage of weight loss (minus value) and weight gain (normal value) compared between month 0 and the final month are presented in the final column. Gray boxes indicate monkeys that had a positive TB culture. N/A means not applicable.

| Monkey ID | Body weight (kg) at different time point (months) |       |       |       |       |       |       | Percentage of body weight loss or gain between month 0 and death or the end of the study |
|-----------|---------------------------------------------------|-------|-------|-------|-------|-------|-------|------------------------------------------------------------------------------------------|
|           | 0                                                 | 2     | 4     | 6     | 8     | 10    | 12    |                                                                                          |
| MKx019    | 2.1                                               | death | death | death | death | death | death | N/A                                                                                      |
| MKx020    | 5.9                                               | 6.1   | 4.7   | death | death | death | death | -20.34                                                                                   |
| MKx027    | 5.3                                               | 4.9   | 4.2   | 3.1   | death | death | death | -41.51                                                                                   |
| MKx010    | 3.8                                               | 3.4   | death | death | death | death | death | -10.53                                                                                   |
| MKx014    | 7.3                                               | 7.4   | 7     | 6.9   | 7     | 7.8   | 6.3   | -13.7                                                                                    |
| MKx026    | 2.7                                               | 2.7   | death | death | death | death | death | 0                                                                                        |
| MKx035    | 5.2                                               | 5.2   | 4.6   | 4.7   | death | death | death | -9.62                                                                                    |
| MKx018    | 3.2                                               | 3.2   | 2.9   | 3.2   | death | death | death | 0                                                                                        |
| MKx005    | 6.1                                               | 6.2   | 5.5   | 5.6   | 5.8   | death | death | 3.28                                                                                     |
| MKx012    | 5.25                                              | 5.4   | 5     | 5     | 5.1   | 5.2   | 5.3   | 0.95                                                                                     |
| MKx013    | 4                                                 | 4.4   | 3.9   | 4.1   | 3.9   | death | death | -2.5                                                                                     |
| MKx042    | 2.2                                               | 2.3   | 2.4   | 2.7   | 2.8   | 2.9   | 3.2   | 45.45                                                                                    |
| MKx051    | 6.4                                               | 5.6   | 5     | 5.1   | 5.2   | 5.1   | death | -20.31                                                                                   |
| MKx052    | 2.3                                               | 2.5   | 2.1   | 2.8   | 3.2   | 3.4   | 3.8   | 65.22                                                                                    |

**Table S6 Monkey ID number and the number of monkeys (in brackets) from 5 individual cages** TB infection results of 39 cynomolgus monkeys in 5 cages (cage nos. 1/1, 2/1, 3/1, O2 and 5/5) are summarized. Numbers (in brackets) indicate the number of monkeys residing in a cage with positive results in the TB diagnostic methods used (mIGRA, TST and TB culture). P, ID, and S mean positive, indeterminate, and suspected, respectively. In this study, ID mIGRA results were considered negative for TB infection, while suspected TST (S) results were considered positive for TB infection.

| Cage nos. | Number of monkeys (cases)                                                                                                |                                                 |                                         |                                                 |
|-----------|--------------------------------------------------------------------------------------------------------------------------|-------------------------------------------------|-----------------------------------------|-------------------------------------------------|
|           | Total                                                                                                                    | P or ID - mIGRA                                 | P or S -TST                             | P-TB culture                                    |
| 1/1       | MKx014, MKx012,<br>MKx013, MKx011,<br>MKx017                                                                             | MKx014,<br>MKx012,<br>MKx013,                   | MKx014 - P,<br>MKx013 - S               | MKx014                                          |
|           | (n = 5)                                                                                                                  | (P = 3)                                         | (P = 1, S = 1)                          | (P = 1)                                         |
| 2/1       | MKx019, MKx020,<br>MKx027, MKx021,<br>MKx018, MKx026                                                                     | MKx019,<br>MKx020,<br>MKx027,<br>MKx018, MKx026 | MKx019,<br>MKx020,<br>MKx027,<br>MKx018 | MKx019,<br>MKx020,<br>MKx027,<br>MKx021, MKx026 |
|           | (n = 6)                                                                                                                  | MKx021 – ID<br>(ID = 1, P = 5)                  | (P = 4)                                 | (P = 5)                                         |
| 3/1       | MKx010, MKx005,<br>MKx002, MKx007,<br>MKx008, MKx009                                                                     | MKx010, MKx005                                  | MKx010 - S,<br>MKx009 - S               | MKx010                                          |
|           | (n = 6)                                                                                                                  | (P = 2)                                         | (S - 2)                                 | (P = 1)                                         |
| O2        | MKx042, MKx051,<br>MKx052, MKx040,<br>MKx043, MKx044,<br>MKx046, MKx047,<br>MKx048, MKx050,<br>MKx054, MKx059,<br>MKx060 | MKx042,<br>MKx051,<br>MKx052,                   | MKx051 – S                              | undetectable                                    |
|           | (n = 13)                                                                                                                 | (P = 3)                                         | (S - 1)                                 |                                                 |
| 5/5       | MKx035, MKx029,<br>MKx030, MKx031,<br>MKx033, MKx034,<br>MKx036, MKx037,<br>MK038                                        | MKx035                                          | MKx029 - S                              | MKx035                                          |
|           | (n = 9)                                                                                                                  | (P = 1)                                         | (S = 1)                                 | (P = 1)                                         |
